# Supplementary material for: Modelling ethnic differences in the distribution of insulin resistance via Bayesian nonparametric processes: an application to the SABRE cohort study
Source: publisher site journal article supplement (doi:10.1515/ijb-2019-0108), 2020-08-31
Supplement: Supplementary file 1 [file j_ijb-2019-0108_suppl.pdf]

# 1 MCMC Algorithm

In this section we describe the steps of the MCMC algorithm. We implement a Gibbs sampling, which requires a Metropolis update for some parameters.

1. The update of  $\beta$ , the vector of regression coefficients, is the standard conjugate update from a Normal model, but conditional on the Spike and Slab selection. Note that in our application the observation  $y_i$  are also indexed by the ethnicity indicator  $g$ . For ease of notation we drop the subscript  $g$  as we assume the regression coefficients to be the same across ethnicities and we simply assume to have a total of  $n$  observations. We introduce the latent variable indicator vector  $\omega = (\omega_1, \dots, \omega_{p-1})$ , where the element  $\omega_j$  is equal to 1 if the  $j_{th}$  covariate is included in the model and 0 otherwise. If  $\omega_j = 0$  then the corresponding  $\beta_j$  is equal to zero. Let  $\beta_\omega$  denote the sub-vector of  $\beta$  including elements for which the corresponding  $\omega_j$  is equal to 1 (slab component of the model) and let  $\mathbf{X}_\omega$  be the design matrix consisting only of those columns of  $\mathbf{X}$  corresponding to non-zero effects. Then the conditional distribution of  $\beta_\omega$

$$\begin{aligned} p(\beta_\omega \mid rest) &\propto \prod_{i=1}^n \mathcal{N}(y_i \mid \beta_{0i} + x_{\omega i} \beta_\omega, \tau_i^2) \times \prod_{j:\omega_j=1} \mathcal{N}(\beta_j \mid \mu_\beta, \tau_\beta^2) \\ &= \mathcal{N}(\beta_\omega \mid \tilde{\mu}_\beta, \tilde{C}_\beta) \end{aligned}$$

where

$$\begin{aligned} \tilde{C}_\beta &= \tau_\beta^2 I + \mathbf{X}'_\omega V \mathbf{X}_\omega \\ V &= \begin{bmatrix} \tau_1^2 & 0 & \dots & 0 \\ 0 & \tau_2^2 & \ddots & 0 \\ \vdots & 0 & \ddots & \dots \\ 0 & \dots & 0 & \tau_n^2 \end{bmatrix} \\ \tilde{\mu}_\beta &= \tilde{C}_\beta^{-1} (\tau_\beta^2 \mu_\beta + \mathbf{X}'_\omega V y) \end{aligned}$$

and  $y = (y_1, \dots, y_n)$ . Here  $\mu_\beta$  is the vector of appropriate dimension whose elements are all equal to  $\mu_\beta$ .

2. The update of  $\omega$  is performed evaluating the model marginal likelihood individually for each covariate (with the intercept  $\beta_{0i}$  always included) as

$$p(\omega_j = 1 \mid \omega_{\setminus j}, rest) = \left[ 1 + \frac{1 - \pi}{\pi} \frac{p(y \mid \omega_j = 0, \omega_{\setminus j}, \tau_1^2, \dots, \tau_n^2)}{p(y \mid \omega_j = 1, \omega_{\setminus j}, \tau_1^2, \dots, \tau_n^2)} \right]^{-1}$$

where  $\omega_{\setminus j}$  denotes the vector  $\omega$  excluding  $\omega_j$ .  $p(y \mid \omega_j = 1, \omega_{\setminus j}, \tau_1^2, \dots, \tau_n^2)$  represents the marginal likelihood of the model obtained marginalising with respect to  $\beta$ :

$$\begin{aligned} p(y \mid \omega_j = 1, \omega_{\setminus j}, \tau_1^2, \dots, \tau_n^2) &= \\ &= \int_{\beta} p(y, \beta \mid \tau_1^2, \dots, \tau_n^2, \omega_j = 1, \omega_{\setminus j}) d\beta \\ &= \int_{\beta} p(y \mid \beta, \tau_1^2, \dots, \tau_n^2, \omega_j = 1, \omega_{\setminus j}) p(\beta) d\beta \\ &= -\frac{1}{2} n \log(2\pi) + \frac{1}{2} \log(|\tau_{\beta}^2 I|) - \frac{1}{2} \log(|\tilde{C}_{\beta}|) \\ &= -\frac{1}{2} (\tilde{y}' \tilde{y} - \tilde{\mu}'_{\beta} \tilde{C}_{\beta} \tilde{\mu}_{\beta}) \end{aligned}$$

where  $|A|$  is the determinant of the matrix  $A$  and  $\tilde{y} = (\tilde{y}_1, \tilde{y}_2, \dots, \tilde{y}_n)'$ , where  $\tilde{y}_i = (y_i - \beta_{0i}) \tau_i$ .

3. The update of  $\pi$  is a straightforward conjugate update from a Beta-Bernoulli model

$$p(\pi \mid rest) = \text{Beta}(\pi_a + \sum \omega_j, \pi_b + (p - 1) - \sum \omega_j)$$

4. To update the DGDP we adopt a truncated stick-breaking approach, i.e. we approximate the infinite mixture with a finite mixture with  $L$  components where  $L$  is large. A discussion on the truncation level can be found in Ishwaran and James (2001) and Barcella, De Iorio, Favaro, and Rosner (2017). We perform the following steps in order to update the parameters of the DGDP.

(a) *Resampling the cluster allocation vector, given the rest.* Conditionally on the remaining parameters in the model, the allocation vectors,  $s_g$ , are independent. Note that we have an allocation vector for each ethnicity

g. Let  $s_{ig}$  be the cluster indicator for observation  $i$  in group  $g$ , with  $s_{ig} \in 1, \dots, L$ , for  $i = 1, \dots, n$ . We draw  $s_{ig}$  from

$$p(s_{ig} = k \mid \text{rest}) \propto \psi_{kg} \mathcal{N}(y_{ig} \mid \beta_{0i} + \sum_{j:\omega_j=1} \beta_j x_{ij}, \tau_i^2)$$

for  $k = 1, \dots, L$ .

- (b) *Resampling the mixture weights,  $\psi_{kg}$ , given the rest.* Conditionally on  $g$  and the remaining parameters in the model, the mixture weights for each group are independent. This is a straightforward update due to the conjugacy between the Generalised Dirichlet distribution on  $\psi_{1g}, \dots, \psi_{Lg}$  and the Multinomial distribution on  $s$ :

$$\phi_{kg} \mid \text{rest} \sim \text{Beta} \left( \mu_g v + \sum_{i=1}^{n_g} \mathbf{I}(s_{ig} = k), (1 - \mu_g) v + \sum_{i=1}^{n_g} \mathbf{I}(s_{ig} > k) \right)$$

where  $n_g$  is the number of observations in group  $g$  and  $\mathbf{I}(\cdot)$  represents the indicator function, assuming value 1 if the inner condition is satisfied and 0 otherwise. Then the weights  $\psi_{kg}$  can be obtained using a stick-breaking procedure.

- (c) *Resampling  $\mu = (\mu_1, \dots, \mu_G)$  given the rest.* Conditionally on the weights  $\psi_{kg}$  and  $v$  we update  $\mu$  with a Metropolis-Hastings step, using a Multivariate Normal proposal. In this case the data corresponds to the set of sticks  $\phi_{kg}$  and the likelihood is given by the product of Beta distributions. See Barcella et al. (2017) for details.
- (d) *Resampling  $v$  given the rest.* Conditionally on the weights  $\psi_{kg}$  and  $\mu$  we update  $v$  with a Metropolis-Hastings step, with a Gamma proposal and data given by the set sticks  $\phi_{kg}$  for  $g = 1, \dots, G$ .
- (e) *Resampling of the locations  $\theta_k = (\beta_{0k}, \tau_k^2)$  given the rest.* The locations of the DGDP are a priori *iid* realisations of the base measure  $G_0 = \mathcal{N}(m_0, \kappa_0^2) \times \text{Gamma}(\tau_a, \tau_b)$ . Given the clustering structure defined by the allocation vector  $s$ , the update of  $\theta_k$  is performed separately for each cluster and it is a straightforward conjugate update:

$$p(\beta_{0k}, \tau_k^2 \mid \text{rest}) \propto G_0(\beta_{0k}, \tau_k^2) \prod_{i,g:s_{ig}=k} \mathcal{N}(y_{ig} \mid \beta_{0k} + \sum_{j:\omega_j=1} \beta_j x_{ij}, \tau_k^2)$$

for  $k = 1, \dots, L$

## 2 Tables

Here we provide the list of metabolites, anthropometric and clinical covariates included in the analysis.

## References

- Barcella, W., M. De Iorio, S. Favaro, and G. L. Rosner (2017): “Dependent generalized dirichlet process priors for the analysis of acute lymphoblastic leukemia,” *Biostatistics*, 19, 342–358.
- Ishwaran, H. and L. F. James (2001): “Gibbs sampling methods for stick-breaking priors,” *Journal of the American Statistical Association*, 96, 161–173.

Table 1: List of metabolites included in the analysis. Each listed lipoprotein is further fractionated according to the content of triglycerides, phospholipids, cholesterol esters and free cholesterol.

| Abbreviation | Full name                                                 |  | Abbreviation    | Full name                               |
|--------------|-----------------------------------------------------------|--|-----------------|-----------------------------------------|
| acace        | Acetoacetate                                              |  |                 |                                         |
| ace          | Acetate                                                   |  |                 |                                         |
| ala          | Alanine                                                   |  |                 |                                         |
| alb          | Albumin                                                   |  |                 |                                         |
| apoa1        | Apolipoprotein A-I                                        |  |                 |                                         |
| apob         | Apolipoprotein B                                          |  |                 |                                         |
| bohbut       | 3-hydroxybutyrate                                         |  |                 |                                         |
| cit          | Citrate                                                   |  |                 |                                         |
| crea         | Creatinine                                                |  |                 |                                         |
| dha          | 22:6, docosahexaenoic acid                                |  |                 |                                         |
| faw3         | Omega-3 fatty acids                                       |  |                 |                                         |
| faw6         | Omega-6 fatty acids                                       |  |                 |                                         |
| gln          | Glutamine                                                 |  | lipids_s_hdl    | Small HDL lipids compounds              |
| glol         | Glycerol                                                  |  | lipids_m_hdl    | Medium HDL lipids compounds             |
| gly          | Glycine                                                   |  | lipids_l_hdl    | Large HDL lipids compounds              |
| gp           | Glycoprotein acetyls, mainly $\alpha$ 1-acid glycoprotein |  | lipids_xl_hdl   | Extra large HDL lipids compounds        |
|              |                                                           |  | lipids_s_ldl    | Small LDL lipids compounds              |
|              |                                                           |  | lipids_m_ldl    | Medium LDL lipids compounds             |
|              |                                                           |  | lipids_l_ldl    | Large LDL lipids compounds              |
| his          | Histidine                                                 |  | lipids_idl      | IDL lipids compounds                    |
| ile          | Isoleucine                                                |  | lipids_xs_vldl  | Extra small VLDL lipids compounds       |
| la           | 18:2, linoleic acid                                       |  | lipids_s_vldl   | Small VLDL lipids compounds             |
| lac          | Lactate                                                   |  | lipids_m_vldl   | Medium VLDL lipids compounds            |
| leu          | Leucine                                                   |  | lipids_l_vldl   | Large VLDL lipids compounds             |
| mufa         | Monounsaturated fatty acids; 16:1, 18:1                   |  | lipids_xl_vldl  | Extra large VLDL lipids compounds       |
|              |                                                           |  | lipids_xxl_vldl | Extra extra large VLDL lipids compounds |
| pc           | Phosphatidylcholine and other cholines                    |  |                 |                                         |
| phe          | Phenylalanine                                             |  |                 |                                         |
| pufa         | Polyunsaturated fatty acids                               |  |                 |                                         |
| pyr          | Pyruvate                                                  |  |                 |                                         |
| sfa          | Saturated fatty acids                                     |  |                 |                                         |
| sm           | Sphingomyelins                                            |  |                 |                                         |
| tyr          | Tyrosine                                                  |  |                 |                                         |
| unsatdeg     | Estimated degree of unsaturation                          |  |                 |                                         |
| val          | Valine                                                    |  |                 |                                         |

Table 2: List of clinical and anthropometric covariates

| <b>Abbreviation</b> | <b>Full name</b>                  |
|---------------------|-----------------------------------|
| Age                 | Age at the first visit (baseline) |
| WHR                 | Waist to Hip Ratio                |
| Thigh skinfold      | Thigh skinfold                    |
| Sagittal diam       | Sagittal diameter                 |
| Subscap skinfold    | Subscapular skinfold              |
| Supiliac skinfold   | Suprailiac skinfold               |
| Thigh circumf       | Thigh circumference               |
| Triceps skinfold    | Triceps skinfold                  |
| bp_avdias           | Blood pressure diastolic          |
| bp_avsys            | Blood pressure systolic           |
| AST                 | Aspartate aminotransferase        |
| GGT                 | Gamma glutamyltransferase         |
| Sex female          | Dummy variable for female sex     |
| Smoke_Ex            | Dummy variable ex smoker          |
| Smoke_Current       | Dummy variable current smoker     |
